# Supplementary material for: A MicroRNA-Based Method for High-Viremia Detection—A New Approach on a Romanian Lot of Chronically Infected Patients with Hepatitis B Virus
Source: MDPI journal article supplement (doi:10.3390/diagnostics13223425), 2023-11-10
Supplement: s1 [file s1]

**Table S2.** Multivariate logistic analysis on the models from microRNA subgroup.

| Model 1     |           |                |                       | Model 2   |                |                       | Model 3   |               |                       |
|-------------|-----------|----------------|-----------------------|-----------|----------------|-----------------------|-----------|---------------|-----------------------|
| Estimates   | Estimates | 95%<br>CI*     | <i>p</i> -<br>value** | Estimates | 95%<br>CI*     | <i>p</i> -<br>value** | Estimates | 95%<br>CI*    | <i>p</i> -<br>value** |
| (Intercept) | 1.30      | 0.66-<br>1.93  | <0.001                | 0.98      | 0.28-<br>1.67  | 0.006                 | 0.42      | 0.21-<br>0.62 | <0.001                |
| Age         | -0.02     | -0.03-<br>0.00 | 0.021                 | -0.01     | -0.02-<br>0.00 | 0.1                   |           |               |                       |
| miR-122     |           |                |                       | 0.03      | 0.00-<br>0.06  | 0.065                 | 0.04      | 0.01-<br>0.06 | 0.013                 |

\* CI-confidence interval; \*\* $p < 0.2$  was considered significant because of the small number of subjects.
