# Supplementary material for: A MicroRNA-Based Method for High-Viremia Detection—A New Approach on a Romanian Lot of Chronically Infected Patients with Hepatitis B Virus
Source: MDPI journal article supplement (doi:10.3390/diagnostics13223425), 2023-11-10
Supplement: s1 [file s1]

**Table S1.** Models included in multivariate logistic analysis.

| Model 1        |           |                |                       | Model 2   |                 |                       | Model 3   |                 |                       |
|----------------|-----------|----------------|-----------------------|-----------|-----------------|-----------------------|-----------|-----------------|-----------------------|
| Estimates      | Estimates | 95%<br>CI*     | <i>p</i> -<br>value** | Estimates | 95%<br>CI*      | <i>p</i> -<br>value** | Estimates | 95%<br>CI*      | <i>p</i> -<br>value** |
| (Intercept)    | 0.96      | 0.48-<br>1.44  | <0.001                | 2.35      | 1.03-<br>3.67   | <0.001                | 1.96      | 0.66-<br>3.26   | 0.003                 |
| Age<br>(years) | -0.01     | -0.02-<br>0.00 | 0.035                 | -0.01     | -0.02-<br>0.00  | 0.042                 |           |                 |                       |
| RDW* (%)       |           |                |                       | 0.11      | -0.21-<br>-0.01 | 0.028                 | -0.12     | -0.21-<br>-0.02 | 0.023                 |

\*RDW-red cell width, CI-confidence interval; \*\* $p < 0.2$  was considered significant. The lowest  $p$ -values were obtained from models 1 and 2, so they were considered the best.
