# Supplementary material for: A MicroRNA-Based Method for High-Viremia Detection—A New Approach on a Romanian Lot of Chronically Infected Patients with Hepatitis B Virus
Source: MDPI journal article supplement (doi:10.3390/diagnostics13223425), 2023-11-10
Supplement: s1 [file s1]

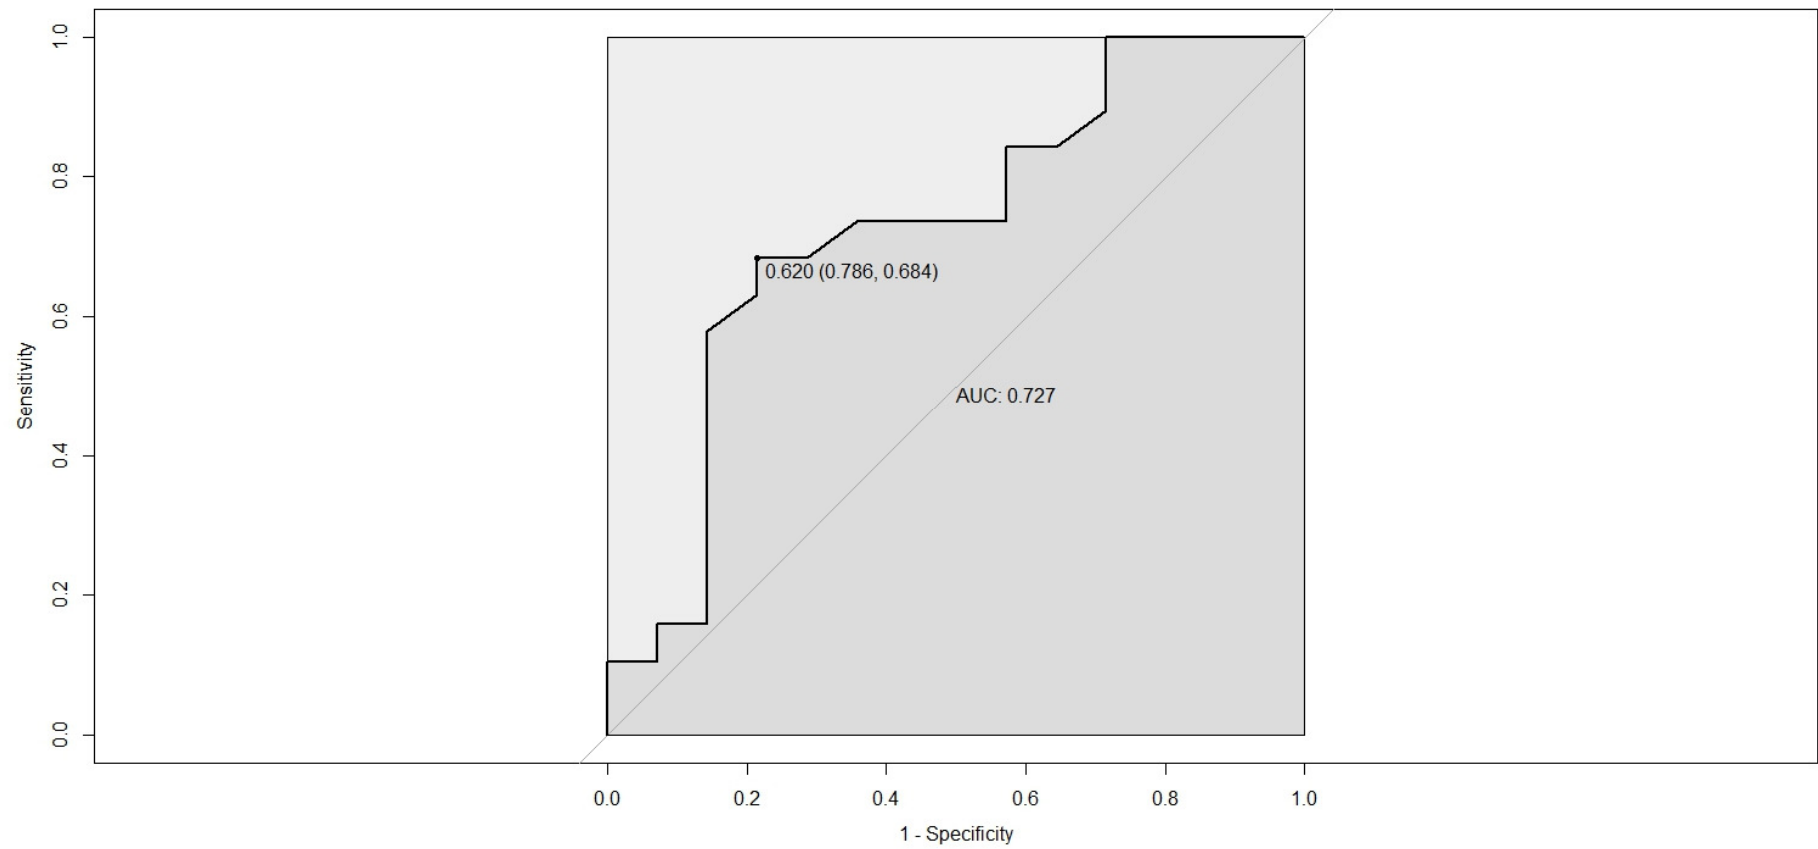

**Figure S2.** ROC curve for a logistic model based on the age (years) variable; AUC-aria under the curve. The numbers listed above AUC represent the best threshold, and the calculated specificity and sensitivity (the last two values were placed in parenthesis). This model used for high viremia prediction had poor AUC.
